# Supplementary material for: In vitro characterization of 3D culture-based differentiation of human liver stem cells
Source: Frontiers journal article supplement (doi:10.3389/fcell.2024.1352013), 2024-02-08
Supplement: Data_Sheet_1.pdf [file Data_Sheet_1.pdf]

## *Supplementary Material*

### **In vitro characterization of 3D culture-based differentiation of human liver stem cells**

Marta Tapparo<sup>1,2\*</sup>, Gabriele Saccu<sup>2,3</sup>, Chiara Pasquino<sup>2,4</sup>, Valentina Fonsato<sup>2,4</sup>, Claudio Medana<sup>3</sup>, Valentina Schiavo<sup>3</sup>, Enrica Mecarelli<sup>3</sup>, Monica Maccagno<sup>2,3</sup>, Lorenzo Silengo<sup>2</sup>, Stefania Bruno<sup>1</sup>, Giovanni Camussi<sup>1</sup>, Maria Beatriz Herrera Sanchez<sup>2,5\*</sup>

\* **Correspondence:** Dr. Marta Tapparo, [marta.tapparo@unito.it](mailto:marta.tapparo@unito.it), Dr. Maria Beatriz Herrera Sanchez, [mariabeatriz.herrera@unito.it](mailto:mariabeatriz.herrera@unito.it)

#### **Supplementary Figures and Tables**

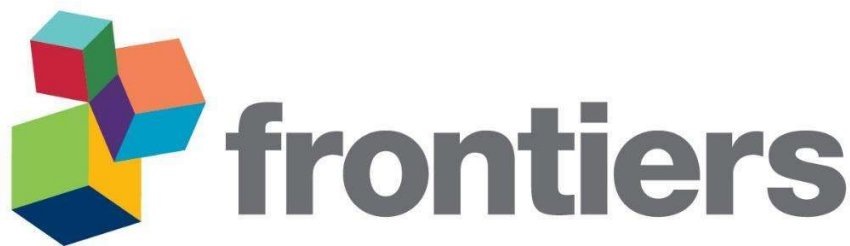

**Supplementary Table 1. Specific Primers pairs used**

| Gene name | Forward primer (5'-3') | Reverse primer (5'-3')  |
|-----------|------------------------|-------------------------|
| h-SLCO1B1 | ACTGATTCTCGATGGGTGGAG  | TGTTCCAGCACATGCAAAGAC   |
| h-NANOG   | ACAACGGCCGAAGAATAGCA   | GGTCCCAGTCGGGTTC        |
| h-OCT4    | AGCAGGAGTCGGGGTGG      | AGAGCTTTGATGTCCTGGGACT  |
| h-SOX2    | TGCGAGCGCTGCACAT       | GCAGCGTGTACTTATCCTTCTCA |

Supplementary Material

|         |                       |                         |
|---------|-----------------------|-------------------------|
| h-KLF4  | CCATAACCAAGAGCTCATGCC | GGGCCACGATCGTCTTCC      |
| h-TBP   | TGTGCACAGGAGCCAAGAGT  | ATTTTCTTGCTGCCAGTCTGG   |
| h-FVIII | CTGTGGACGCAAGATTTCCTC | AGGATGGGAAGCCATGTTCTT   |
| h-FIX   | AGTCCTGTGAACCAGCAGTGC | GGGTGCTTTGAGTGATGTTATCC |
| h-FXI   | CATCCCAGTGTTCTGCCATTC | AGGTAAAAAACTGGCAGCGGA   |

**Supplementary Table 2. List of antibodies used**

| <b>Antibody</b>             | <b>Catalogue number</b> |
|-----------------------------|-------------------------|
| CD44                        | Miltenyi, 130-113-342   |
| CD105                       | Miltenyi, 130-112-321   |
| CD73                        | BD pharmingen, 560847   |
| CD90                        | Miltenyi, 130-117-684   |
| CD29                        | Miltenyi, 130-101-256   |
| CD14                        | Miltenyi, 130-110-577   |
| CD34                        | BD pharmingen, 555821   |
| CD45                        | BD pharmingen, 555482   |
| human Albumin-FITC          | LSBIO, LS-C68850        |
| human Albumin-FITC- isotype | LSBIO, LS-C149360       |
| PE -isotype                 | Miltenyi, 130-113-200   |
| FITC-isotype                | Miltenyi, 130-113-199   |
| APC-isotype                 | Miltenyi, 130-113-196   |
| PCNA                        | Santa Cruz, sc-56       |
| OCT3/4                      | R&D, MAB1759            |

|                   |                                    |
|-------------------|------------------------------------|
| NANOG             | R&D, AF1997                        |
| SOX2              | R&D, MAB2018                       |
| KLF4              | R&D, AF3640                        |
| HNF4a             | Abcam, 92378                       |
| ALBUMIN           | R&D, MAB1455                       |
| Cytokeratin 18    | Abcam, ab52948                     |
| OATP1B1/OATP2     | Novusbio, NB100-74481              |
| CYP1A1            | Santa Cruz, sc-25304               |
| CYP3A4            | Santa Cruz, sc-53850               |
| CYP7A1            | Santa Cruz, sc-518007              |
| OTC               | Abcam, Ab262864                    |
| ASS1              | Abcam, Ab124465<br>Abcam, Ab170952 |
| CPS1              | Abcam, Ab37168<br>Abcam, Ab45956   |
| ARG1              | Abcam, Ab239731                    |
| ASL               | Abcam, Ab201025<br>Abcam, ab97370  |
| FVIII             | Abcam, ab236284<br>Abcam, ab171825 |
| FIX               | Abcam, ab236279                    |
| FXI               | Abcam, ab97346                     |
| CK8               | Abcam, ab59400                     |
| alpha Fetoprotein | R&D, MAB1368                       |
| GAPDH             | Abcam, Ab37168                     |

Supplementary Material

|                                                           |                                                         |
|-----------------------------------------------------------|---------------------------------------------------------|
| Vinculin                                                  | Self-made, kindly provided by Prof. Turco (MBC, Torino) |
| mouse IgG2a (negative control for OTC).                   | Abcam, ab18415                                          |
| rabbit IgG polyclonal (negative control for ASS1)         | Abcam, ab17273                                          |
| rabbit IgG polyclonal (negative control for CPS1 and AGL) | Abcam, ab171870                                         |
| mouse IgG2b (negative control for ARG)                    | Abcam, ab18469                                          |
| Alexa Fluor 488 goat anti-rabbit IgG                      | Invitrogen, A11008                                      |
| Alexa Fluor 546 goat anti-mouse IgG                       | Invitrogen, A11003                                      |
| Alexa Fluor 594 chicken anti-goat IgG                     | Invitrogen, A21468                                      |
| Alexa Fluor 488 goat anti-rat IgG                         | Invitrogen, A11006                                      |
| Alexa Fluor 488 donkey anti-goat igG                      | Invitrogen, A11055                                      |

**Supplementary Table 3. List of genes analyzed in PCR array panel.**

| Refseq    | Symbol  | Description                                          | Name                                                        |
|-----------|---------|------------------------------------------------------|-------------------------------------------------------------|
| NM_000463 | UGT1A1  | UDP glucuronosyltransferase 1 family, polypeptide A1 | BILIQTL1/GNT1/HUG-BR1/UDPGT/UDPGT 1-1/UGT1/UGT1A            |
| NM_019093 | UGT1A3  | UDP glucuronosyltransferase 1 family, polypeptide A3 | UDPGT/UDPGT 1-3/UGT-1C/UGT1-03/UGT1.3/UGT1A3S/UGT1C         |
| NM_007120 | UGT1A4  | UDP glucuronosyltransferase 1 family, polypeptide A4 | HUG-BR2/UDPGT/UDPGT 1-4/UGT-1D/UGT1-04/UGT1.4/UGT1A4S/UGT1D |
| NM_002701 | POUF5F1 | POU class 5 homeobox 1                               | OCT3/OCT4/OTF-3/OTF3/OTF4/Oct-3/Oct-4                       |
| NM_022454 | SOX17   | SRY (sex determining region Y)-box 17                | VUR3                                                        |
| NM_021784 | FOXA2   | Forkhead box A2                                      | HNF3B/TCF3B                                                 |

|           |          |                                                                                     |                                                                             |
|-----------|----------|-------------------------------------------------------------------------------------|-----------------------------------------------------------------------------|
| NM_002273 | KRT8     | Keratin 8                                                                           | CARD2/CK-8/CK8/CYK8/K2C8/K8/KO                                              |
| NM_000224 | KRT18    | Keratin 18                                                                          | CK-18/CYK18/K18                                                             |
| NM_002276 | KRT19    | Keratin 19                                                                          | CK19/K19/K1CS                                                               |
| NM_004364 | CEBPA    | CCAAT/enhancer binding protein (C/EBP), alpha                                       | C/EBP-alpha/CEBP                                                            |
| NM_005194 | CEBPB    | CCAAT/enhancer binding protein (C/EBP), beta                                        | C/EBP-beta/IL6DBP/NF-IL6/TCF5                                               |
| NM_000545 | HNF1A    | HNF1 homeobox A                                                                     | HNF-1A/HNF1/IDDM20/LFB1/MODY3/TCF-1/TCF1                                    |
| NM_000458 | HNF1B    | HNF1 homeobox B                                                                     | FJHN/HNF-1-beta/HNF-1B/HNF1beta/HNF2/HPC11/LFB3/LFB3/MODY5/TCF-2/TCF2/VHNF1 |
| NM_178849 | HNF4A    | Hepatocyte nuclear factor 4, alpha                                                  | FRTS4/HNF4/HNF4a7/HNF4a8/HNF4a9/HNF4alpha/MODY/MODY1/NR2A1/NR2A21/TCF/TCF14 |
| NM_004498 | ONECUT   | One cut homeobox 1                                                                  | HNF-6/HNF6/HNF6A                                                            |
| NM_000295 | SERPINA1 | Serpin peptidase inhibitor, clade A (alpha-1 antiproteinase, antitrypsin), member 1 | A1A/A1AT/AAT/PI/PI1/PRO2275/alpha1AT                                        |
| NM_000477 | ALB      | Albumin                                                                             | ANALBA/FDAH/PRO0883/PRO0903/PRO1341                                         |
| NM_001134 | AFP      | Alpha-fetoprotein                                                                   | AFPD/FETA/HPAFP                                                             |
| NM_000277 | PAH      | Phenylalanine hydroxylase                                                           | PH/PKU/PKU1                                                                 |
| NM_000499 | CYP1A1   | Cytochrome P450, family 1, subfamily A, polypeptide 1                               | AHH/AHRR/CP11/CYP1/P1-450/P450-C/P450DX                                     |
| NM_000761 | CYP1A2   | Cytochrome P450, family 1, subfamily A, polypeptide 2                               | CP12/P3-450/P450(PA)                                                        |
| NM_000104 | CYP1B1   | Cytochrome P450, family 1, subfamily B, polypeptide 1                               | CP1B/CYPIB1/GLC3A/P4501B1                                                   |
| NM_000767 | CYP2B6   | Cytochrome P450, family 2, subfamily B, polypeptide 6                               | CPB6/CYP2B/CYP2B7/CYP2B7P/CYPIIB6/EFVM/IIB1/P450                            |

Supplementary Material

|           |        |                                                       |                                                                |
|-----------|--------|-------------------------------------------------------|----------------------------------------------------------------|
| NM_000771 | CYP2C9 | Cytochrome P450, family 2, subfamily C, polypeptide 9 | CPC9/CYP2C/CYP2C10/CYP2C9/P450IIC9                             |
| NM_017460 | CYP3A4 | Cytochrome P450, family 3, subfamily A, polypeptide 4 | CP33/CP34/CYP3A/CYP3A3/CYP3A4/CYP3A4/HLP/NF-25/P450C3/P450PCN1 |
| NM_000765 | CYP3A7 | Cytochrome P450, family 3, subfamily A, polypeptide 7 | CP37/CYP3A7/P-450(HFL33)/P-450111A7/P450-HFLA                  |
| NM_000780 | CYP7A1 | Cytochrome P450, family 7, subfamily A, polypeptide 1 | CP7A/CYP7/CYPVII                                               |
| NM_001875 | CPS1   | Carbamoyl-phosphate synthetase 1, mitochondrial       | CPSASE1/PHN                                                    |
| NM_000050 | ASS1   | Argininosuccinate synthase 1                          | ASS/CTLN1                                                      |
| NM_000531 | OTC    | Ornithine carbamoyltransferase                        | OCTD                                                           |
| NM_000045 | ARG1   | Arginase, liver                                       | -                                                              |
| NM_000048 | ASL    | Argininosuccinate lyase                               | ASAL                                                           |
| NM_001101 | ACTB   | Actin, beta                                           | BRWS1/PS1TP5BP1                                                |
| NM_004048 | B2M    | Beta-2-microglobulin                                  | -                                                              |
| NM_000194 | HPRT1  | Hypoxanthine phosphoribosyltransferase 1              | HGPRT/HPRT                                                     |
| NM_002046 | GAPDH  | Glyceraldehyde-3-phosphate dehydrogenase              | G3PD/GAPD/HEL-S-162eP                                          |
| NM_000181 | GUSB   | Glucuronidase, beta                                   | BG/MPS7                                                        |
| SA_00104  | RTC    | Reverse Transcription Control                         | RTC                                                            |
|           | PPC    | Inter Plate Reproducibility Control                   | PPC                                                            |
| SA_00105  | HGDC   | Human Genomic DNA Contamination                       | HIGX1A                                                         |

**Supplementary Table 4: Total RNA quantification**

| Sample ID        | Nucleic Acid (ng/μl) |
|------------------|----------------------|
| HLSC sample 1    | 452.4                |
| HLSC sample 2    | 478.7                |
| HLSC sample 3    | 471.6                |
| HLSC sample 4    | 847.3                |
| HLSC sample 5    | 856.9                |
| RCCS 1d sample 1 | 636.1                |
| RCCS 1d sample 2 | 672.2                |
| RCCS 1d sample 3 | 586.2                |
| RCCS 1d sample 4 | 1576.7               |
| RCCS 1d sample 5 | 996.3                |
| RCCS 4d sample 1 | 536.6                |
| RCCS 4d sample 2 | 387.7                |
| RCCS 4d sample 3 | 134.8                |
| RCCS 4d sample 4 | 431.6                |
| RCCS 4d sample 5 | 360.4                |
| RCCS 7d sample 1 | 70.0                 |
| RCCS 7d sample 2 | 75.5                 |
| RCCS 7d sample 3 | 70.9                 |

**Supplementary Table 5. PCR array gene expression**

| Genes | Symbol   | Fold Change (comparing to HLSC group) |      |               |             |      |               |                  |      |               |
|-------|----------|---------------------------------------|------|---------------|-------------|------|---------------|------------------|------|---------------|
|       |          | RCCS 1d                               |      |               | RCCS 4d     |      |               | Hepatocyte (Hep) |      |               |
|       |          | Fold Change                           | Note | p-value       | Fold Change | Note | p-value       | Fold Change      | Note | p-value       |
| 1     | UGT1A1   | 0.80                                  | B    | 0.8495        | 1.09        | B    | 0.5704        | <b>1580.24</b>   | A    | <b>0.0420</b> |
| 2     | UGT1A3   | 1.48                                  | B    | 0.0797        | <b>3.15</b> | B    | 0.1945        | <b>4775.16</b>   | A    | 0.1432        |
| 3     | UGT1A4   | <b>1.67</b>                           | B    | 0.07318       | <b>2.41</b> | B    | 0.1520        | <b>9846.08</b>   | A    | 0.0603        |
| 4     | POUF5F1  | <b>2.38</b>                           |      | <b>0.0338</b> | <b>5.34</b> |      | <b>0.0000</b> | <b>10.04</b>     |      | 0.2164        |
| 5     | SOX17    | <b>0.20</b>                           |      | <b>0.0014</b> | <b>0.44</b> |      | <b>0.0089</b> | <b>0.61</b>      | A    | 0.3324        |
| 6     | FOXA2    | 1.36                                  | B    | 0.2658        | <b>2.11</b> |      | <b>0.0429</b> | <b>4750.95</b>   | A    | 0.1648        |
| 7     | KRT8     | <b>1.53</b>                           |      | 0.1919        | <b>2.71</b> |      | <b>0.0039</b> | <b>6.29</b>      |      | 0.2149        |
| 8     | KRT18    | <b>0.08</b>                           |      | 0.0606        | <b>0.22</b> |      | 0.0820        | 1.02             |      | 0.7571        |
| 9     | KRT19    | <b>0.13</b>                           | A    | <b>0.0400</b> | <b>0.08</b> | A    | <b>0.0349</b> | <b>3.87</b>      | A    | 0.2240        |
| 10    | CEBPA    | 1.41                                  | B    | 0.9481        | <b>1.50</b> | B    | 0.8788        | <b>4564.16</b>   | A    | <b>0.0091</b> |
| 11    | CEBPB    | 0.86                                  |      | 0.4240        | <b>1.55</b> |      | 0.3872        | 0.82             |      | 0.5550        |
| 12    | HNF1A    | <b>1.76</b>                           | B    | 0.1776        | <b>3.08</b> | B    | 0.0845        | <b>861.91</b>    | A    | 0.1901        |
| 13    | HNF1B    | 1.47                                  |      | <b>0.0214</b> | <b>3.49</b> |      | <b>0.0443</b> | <b>529.20</b>    | A    | 0.192         |
| 14    | HNF4A    | <b>1.61</b>                           | B    | 0.1784        | <b>2.12</b> |      | <b>0.0284</b> | <b>1045.85</b>   | A    | <b>0.0486</b> |
| 15    | ONECUT   | <b>2.87</b>                           |      | <b>0.0236</b> | <b>8.68</b> |      | <b>0.0009</b> | <b>3840.47</b>   | A    | <b>0.0339</b> |
| 16    | SERPINA1 | <b>2.44</b>                           |      | <b>0.0157</b> | <b>8.74</b> |      | <b>0.0108</b> | <b>192646.9</b>  | A    | 0.1425        |
| 17    | ALB      | <b>1.78</b>                           |      | <b>0.0447</b> | <b>2.17</b> | B    | 0.064         | <b>298878.5</b>  | A    | 0.1983        |
| 18    | AFP      | 1.19                                  | B    | 0.6400        | 0.78        | B    | 0.4402        | <b>54.44</b>     | B    | 0.2115        |

Supplementary Material

|    |        |              |          |               |              |          |               |                 |          |               |
|----|--------|--------------|----------|---------------|--------------|----------|---------------|-----------------|----------|---------------|
| 19 | PAH    | 1.38         | <b>B</b> | 0.1786        | <b>3.28</b>  | <b>B</b> | 0.1705        | <b>13016.0</b>  | <b>A</b> | 0.1503        |
| 20 | CYP1A1 | <b>16.25</b> | <b>A</b> | <b>0.0101</b> | <b>35.10</b> | <b>A</b> | 0.0548        | <b>528.95</b>   | <b>A</b> | 0.1542        |
| 21 | CYP1A2 | 1.10         | <b>C</b> | 0.426         | <b>2.11</b>  |          | <b>0.0228</b> | <b>6028.85</b>  | <b>A</b> | 0.0987        |
| 22 | CYP1B1 | <b>9.00</b>  |          | <b>0.0054</b> | <b>25.76</b> |          | <b>0.0000</b> | <b>10.22</b>    |          | <b>0.0512</b> |
| 23 | CYP2B6 | 1.10         | <b>C</b> | 0.4260        | <b>2.12</b>  |          | <b>0.0354</b> | <b>2026.82</b>  | <b>A</b> | <b>0.0193</b> |
| 24 | CYP2C9 | 1.10         | <b>C</b> | 0.4260        | 1.79         | <b>C</b> | <b>0.0016</b> | <b>21400.15</b> | <b>A</b> | 0.1702        |
| 25 | CYP3A4 | <b>3.86</b>  |          | <b>0.0110</b> | <b>11.36</b> |          | <b>0.0113</b> | <b>9564.01</b>  | <b>A</b> | 0.1776        |
| 26 | CYP3A7 | <b>2.96</b>  |          | <b>0.0019</b> | <b>5.85</b>  |          | <b>0.0000</b> | <b>86.69</b>    | <b>B</b> | 0.0833        |
| 27 | CYP7A1 | 1.14         | <b>B</b> | 0.7137        | <b>2.70</b>  |          | <b>0.0416</b> | <b>384.37</b>   | <b>A</b> | 0.0881        |
| 28 | CPS1   | <b>2.03</b>  |          | <b>0.0000</b> | <b>0.70</b>  |          | <b>0.0003</b> | <b>19.72</b>    |          | 0.174         |
| 29 | ASS1   | <b>0.49</b>  |          | <b>0.0018</b> | 1.54         |          | <b>0.0045</b> | <b>13.89</b>    |          | <b>0.0567</b> |
| 30 | OTC    | 1.22         | <b>B</b> | 0.2275        | <b>2.37</b>  | <b>B</b> | 0.0799        | <b>5361.17</b>  | <b>A</b> | 0.1569        |
| 31 | ARG1   | <b>1.72</b>  |          | 0.0595        | <b>2.20</b>  |          | <b>0.0007</b> | <b>278.29</b>   |          | 0.1354        |
| 32 | ASL    | 1.45         |          | 0.0561        | <b>2.15</b>  |          | <b>0.0022</b> | <b>9.24</b>     |          | <b>0.0328</b> |
| 33 | ACTB   | <b>0.55</b>  |          | <b>0.0325</b> | <b>0.33</b>  |          | <b>0.006</b>  | <b>0.55</b>     |          | 0.8272        |

**Supplementary Table 5.** PCR array gene expression analysis. Data are presented as fold-change ( $2^{-\Delta\Delta CT}$ ), which is the normalized gene expression ( $2^{-\Delta CT}$ ) in the test sample in respect to the normalized gene expression ( $2^{-\Delta CT}$ ) in the control sample. p values are calculated using a student's t-test of the replicate  $2^{-\Delta CT}$  values for each gene in the control group and treatment groups. p values less than 0.05 are indicated in blue.

**Supplementary Table 5 Legend:**

**A:** If a gene's average threshold cycle (Ct) value is relatively high (>30) in either the control or test sample, and reasonably low (<30) in the other sample, this suggests that the gene's expression is relatively low in one sample and reasonably detected in the other sample. In this case, the actual fold change value is likely to be at least as large as the calculated and reported fold change result. However, the fold change result may also have greater variation if the p-value is greater than 0.05.

**B:** If a gene's average threshold cycle (Ct) value is relatively high (>30) in both the control and test samples, and the p-value for the fold change is either unavailable or relatively high ( $p > 0.05$ ), this suggests that the gene's expression is low in both samples. However, it is also possible that the gene is expressed in one sample but at a level below the limit of detection. In this case, the fold change result may not be accurate and may have greater variation.

**C:** If a gene's average threshold cycle (Ct) value is either not determined or greater than the defined cut-off (default 35) in both samples, this means that its expression was undetected. As a result, the fold change result for this gene is erroneous and uninterpretable.



### Supplementary Table 6: Total Protein quantification

| Sample ID        | Protein (mg/mL) |
|------------------|-----------------|
| HLSC sample 6    | 2.61            |
| HLSC sample 7    | 2.89            |
| HLSC sample 8    | 2.08            |
| RCCS 4d sample 6 | 2.61            |
| RCCS 4d sample 7 | 3.32            |
| RCCS 4d sample 8 | 1.94            |
| RCCS 7d sample 6 | 1.48            |
| RCCS 7d sample 7 | 1.36            |
| RCCS 7d sample 8 | 1.33            |

### Supplementary Figure 1.

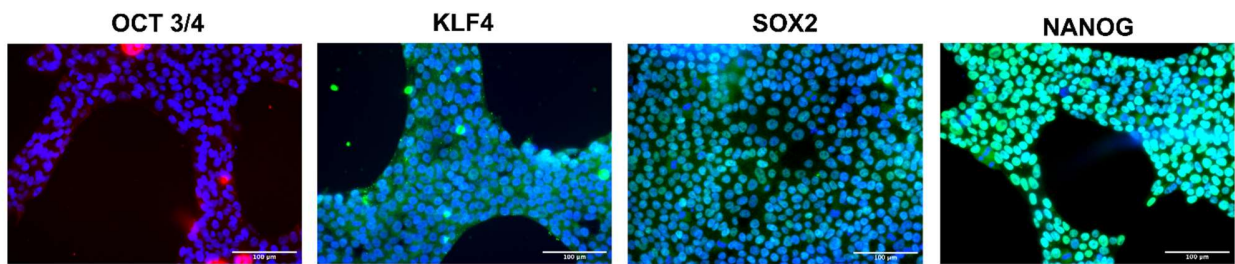

**Supplementary Figure 1.** Stem cell markers on H9 (embryonic stem cell line; positive control). Representative immunofluorescence micrographs of OCT3/4, KLF4, SOX2 and NANOG in H9. Nuclei were stained in blue with DAPI. Scale bar, 100μm.

Supplementary Material

Supplementary Figure 2.

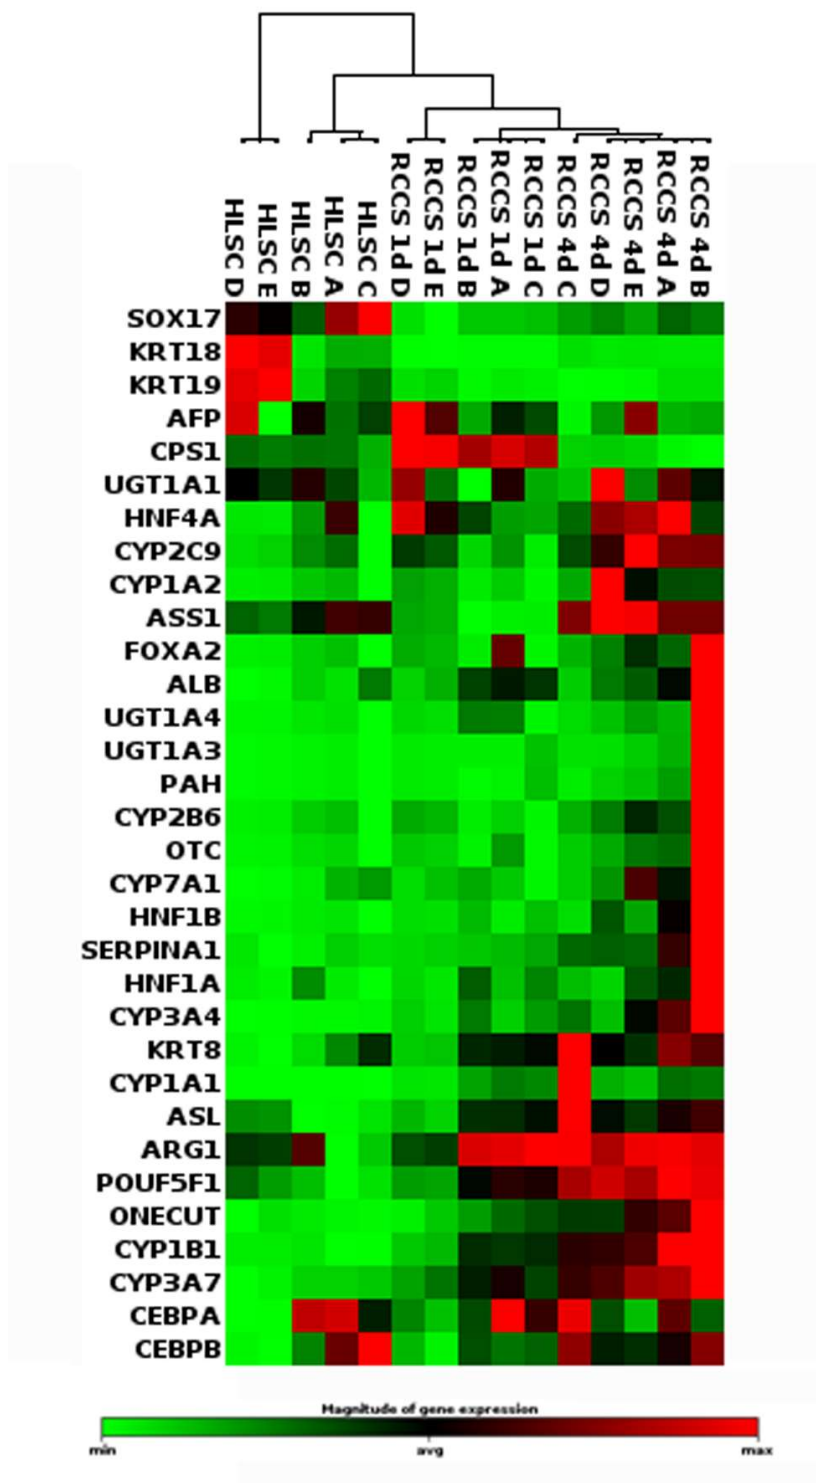

Supplementary Figure 2. Heatmap of PCR array gene expression. Heatmap of single sample gene expression of five biological groups analyzed.

Supplementary Figure 3.

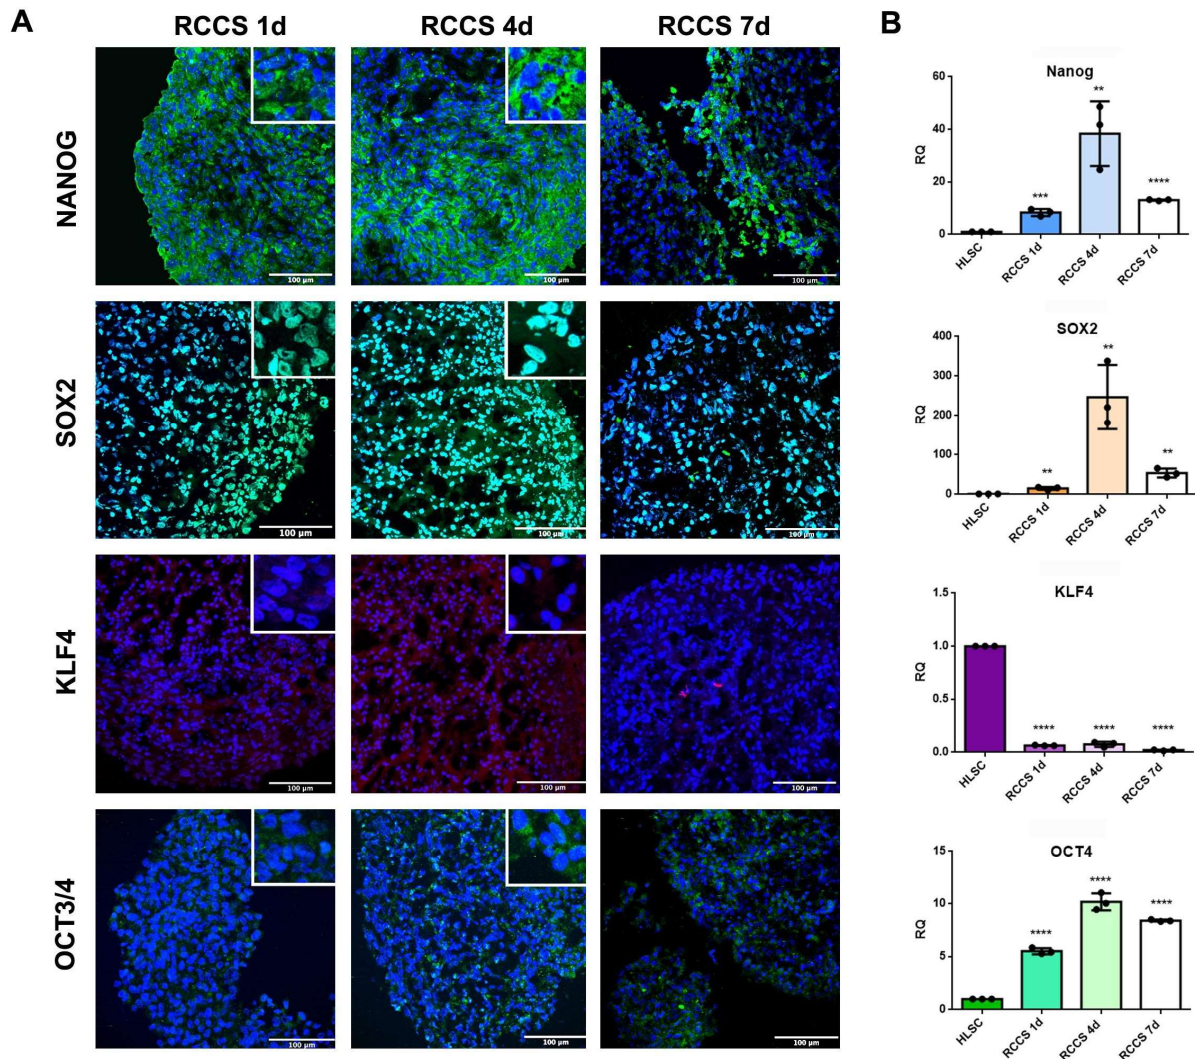

**Supplementary Figure 3. Stem cell markers.** (A) Representative immunofluorescence micrograph of stem cell markers Nanog, SOX2, KLF4, OCT3/4 in undifferentiated HLSCs and RCCS differentiated HLSCs. Scale bar, 100µm; magnification 40X, insert pictures. Nuclei are stained in blue with DAPI. (B) Real-time PCR of the embryonic stem cells genes. Results were normalized using TBP and undifferentiated HLSCs were used as control. Results are expressed as Relative Quantification (RQ). The results are presented as mean values of five independent experiments ±SD. \* p<0.05, \*\* p<0.01, \*\*\* p<0.001, \*\*\*\* p<0.0001 RCCS 1d and 4d vs. HLSC.

Supplementary Figure 4.

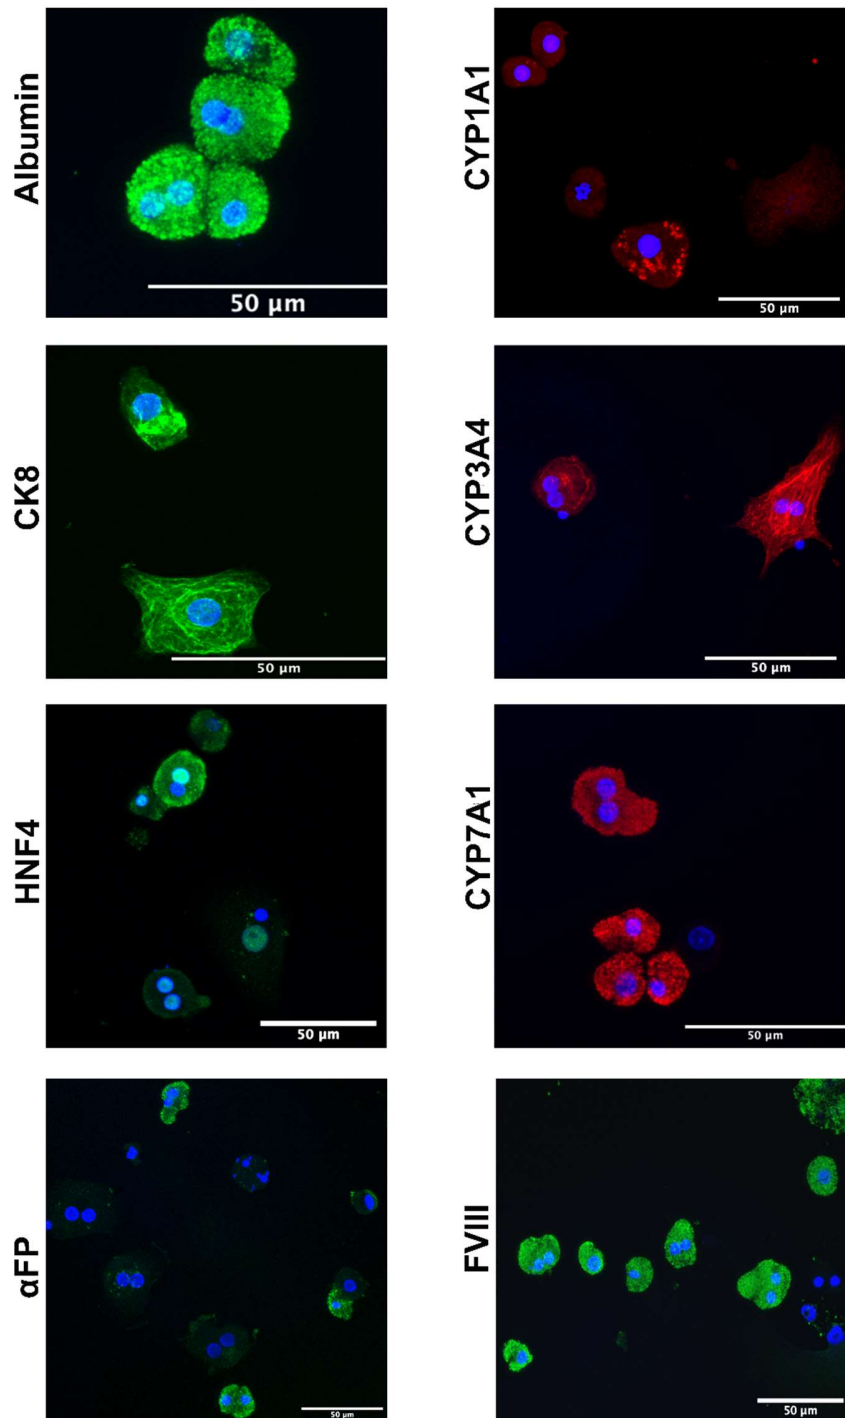

**Supplementary Figure 4. Hepatic markers.** Representative immunofluorescence micrograph data of hepatic markers in human hepatocytes. Scale bar 50μm. Nuclei were stained in blue with DAPI.

**Supplementary Figure 5.**

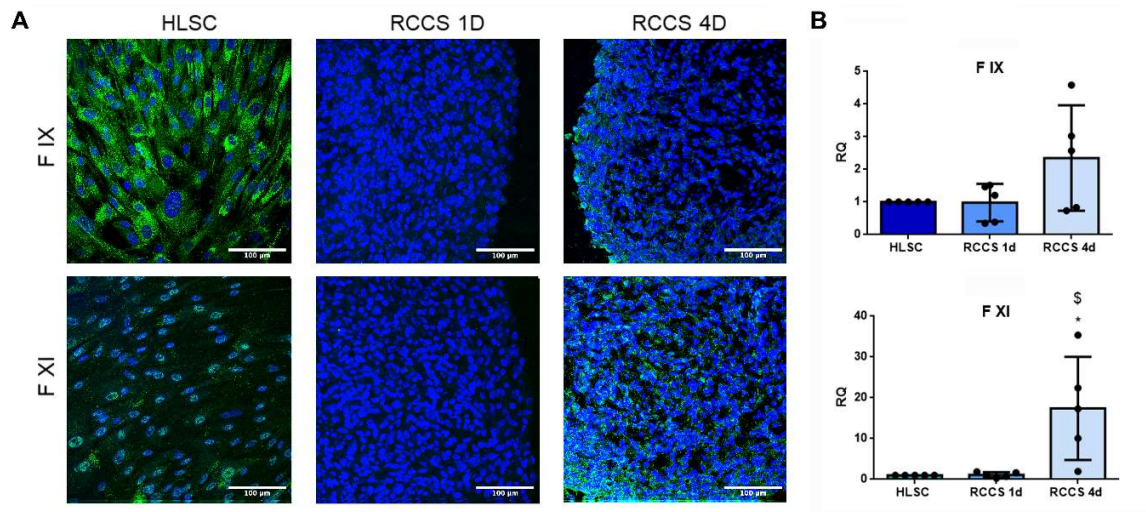

**Supplementary Figure 5. Coagulation Factor expression.** (A) Representative immunofluorescence micrograph data of coagulation factor IX (FIX) and coagulation factor XI (FXI) in HLSC and HLSC aggregates after differentiation in RCCS. Scale bar 100 $\mu$ m. Nuclei were stained in blue with DAPI. (B) Quantitative real-time PCR analysis showed that the expression of coagulation factor genes was upregulated in differentiated HLSC compared to undifferentiated HLSC. Results are normalized to TBP and expressed as relative quantification (RQ). Data are presented as mean values of five independent experiments  $\pm$ SD. \*  $p < 0.05$  RCCS 4d vs. HLSC; \$  $p < 0.05$  RCCS 4d vs RCCS 1d.

Supplementary Figure 6.

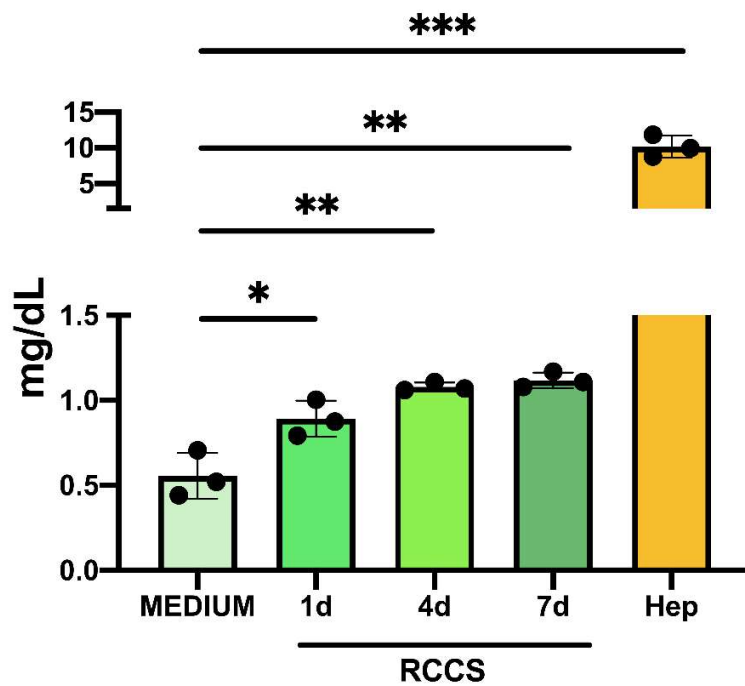

**Supplementary Figure 6. Urea secretion.** Urea into the supernatant of differentiated HLSC in RCCS after 1, 4, 7 days and human hepatocytes after 4 days in RCCS was quantified by Quantichrom assay kit. Results were expressed as mg/dL of urea. The results are presented as mean values obtained from three independent experiments  $\pm$ SD \*  $p < 0.05$ , \*\*  $p < 0.01$ , \*\*\*  $p < 0.001$  HLSC cultured in RCCS 1d, 4d, 7d and human hepatocyte (Hep) vs. medium along.

Supplementary Figure 7.

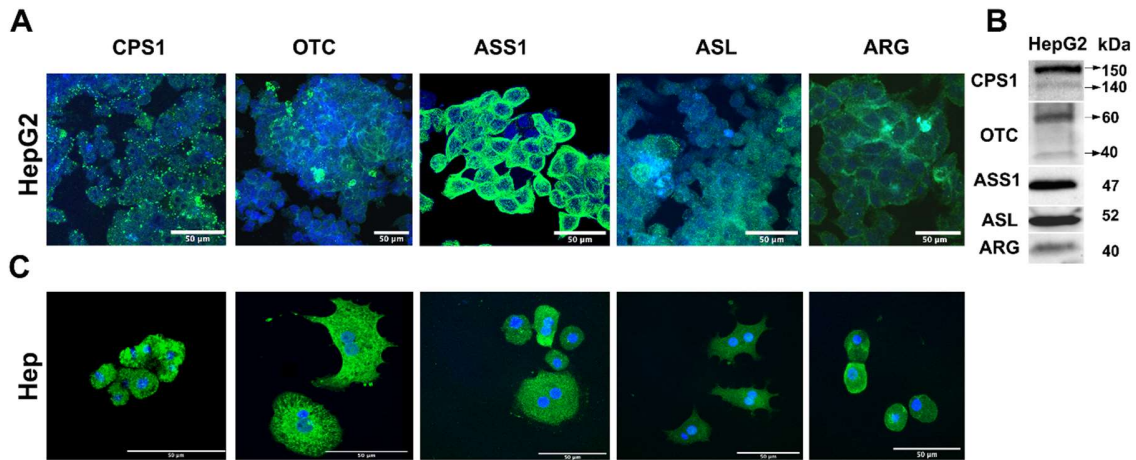

**Supplementary Figure 7.** Urea cycle enzyme on HepG2 (positive control). **(A)** Representative immunofluorescence micrographs of urea cycle enzymes CPS1, OTC, ASS1, ASL and ARG in HepG2. Nuclei were stained in blue with DAPI. Scale bar, 50  $\mu$ m. **(B)** Representative western blot of urea cycle enzymes in HepG2 cells used as positive control. **(C)** Representative immunofluorescence micrographs of urea cycle enzymes CPS1, OTC, ASS1, ASL and ARG in human hepatocytes (Hep). Nuclei were stained in blue with DAPI. Scale bar, 50  $\mu$ m.

Supplementary Figure 8.

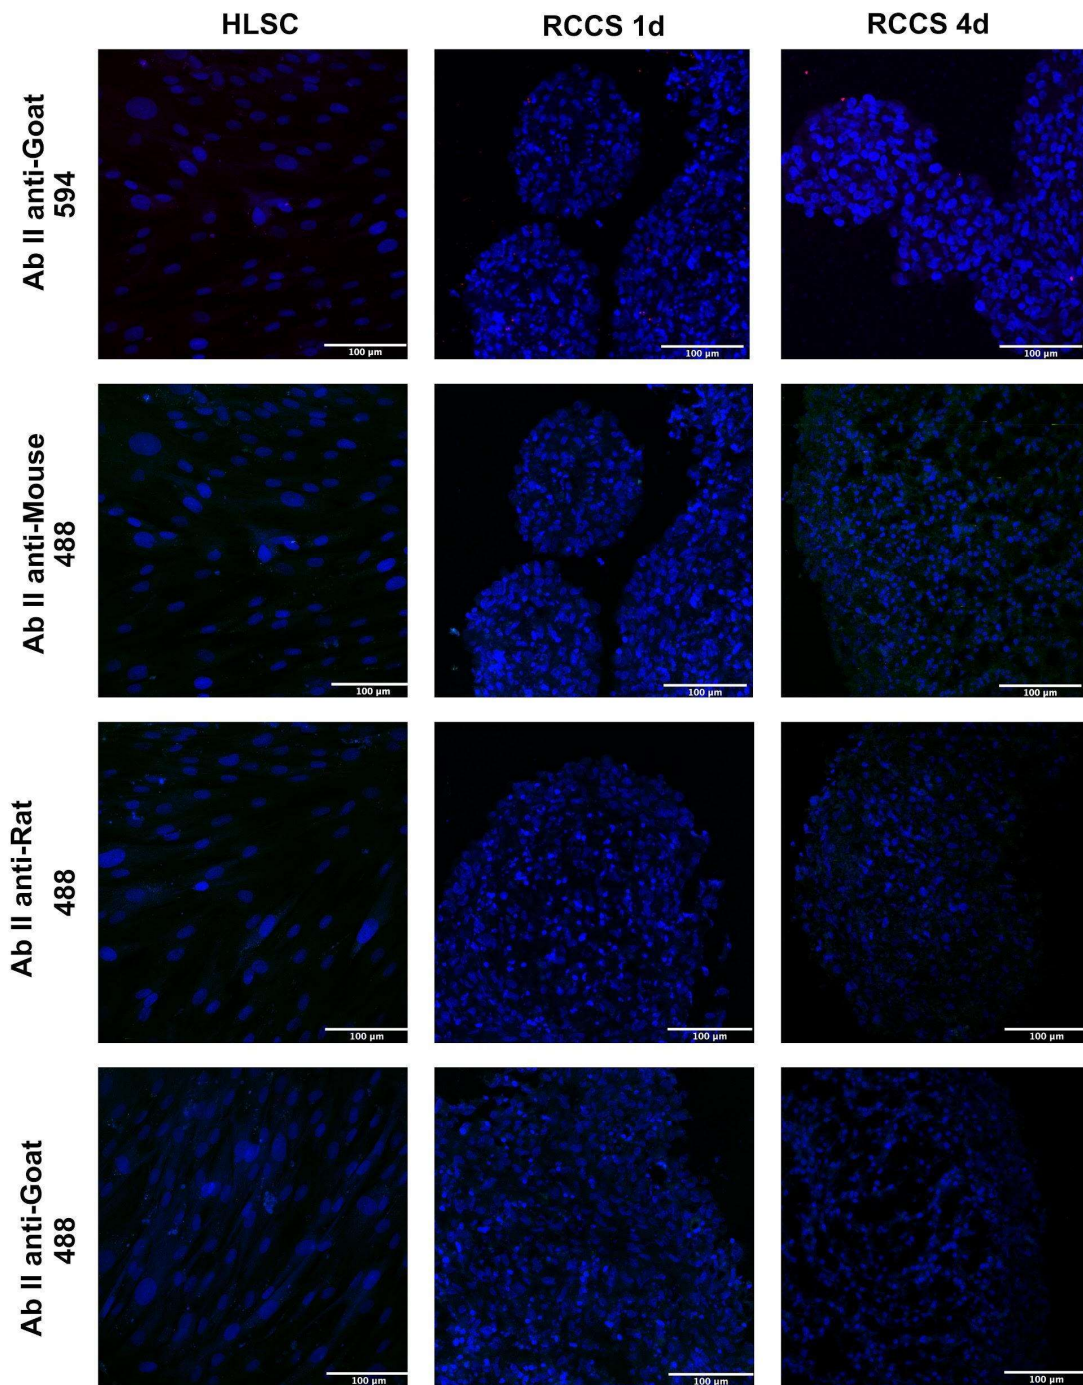

**Supplementary Figure 8. Immunofluorescence analysis of negative controls.** Representative immunofluorescence micrograph of secondary antibodies used to characterize HLSC differentiation. Secondary antibodies: anti-Goat 594 nm (red staining), anti-mouse, anti-rat, anti-goat 488 (green staining). Nuclei were stained in blue with DAPI. Scale bar: 100  $\mu$ m.
